# Supplementary material
Source: publisher figshare collection journal article supplement (https://sage.figshare.com/ndownloader/files/22125003)
Supplement: Supplementary file 1 [file 22125003]

## **Humoral and Cellular Immune Response to Buerger's Disease**

**Authors:** Seyed Morteza Ehteshamfar<sup>1</sup>, Jalil Tavakkol Afshari<sup>\*2,3</sup>, Mohammad Hadi Saeed Modaghegh<sup>\*4</sup>, Mahmoud Mahmoudi<sup>5</sup>, Gholam Hosein Kazemzadeh<sup>6</sup>, Fatemeh Sadeghipour Kermani<sup>7</sup>

<sup>1</sup> Candidate for PhD in immunology, Immunology Research Center, Mashhad University of Medical Sciences, Mashhad, Iran.

<sup>2</sup> Professors of Immunology, Immunology Research Center, Mashhad University of Medical Sciences, Mashhad, Iran

<sup>3</sup> Professors of Immunology, Vascular and Endovascular Surgery Research Center, Mashhad University of Medical Sciences, Mashhad, Iran

<sup>4</sup> Professors of Vascular Surgery, Vascular and Endovascular Surgery Research Center, Mashhad University of Medical Sciences, Mashhad, Iran

<sup>5</sup> Professors of Immunology, Immunology Research Center, Mashhad University of Medical Sciences, Mashhad, Iran

<sup>6</sup> Associate Professor of Vascular Surgery, Vascular and Endovascular Surgery Research Center, Mashhad University of Medical Science, Mashhad, Iran

<sup>7</sup> Community and Preventive Medicine (MD), Vascular and Endovascular Surgery Research Center, Mashhad University of Medical Science, Mashhad, Iran

### **\*Corresponding authors:**

1-Mohammad Hadi Saeid Modaghegh, Professor of Vascular Surgery, Vascular and Endovascular Surgery Research Center, Mashhad University of Medical Sciences, Mashhad, Iran

2- Jalil Tavakkol Afshari, Professor of Immunology, Immunology Research Center, Mashhad University of Medical Sciences, Mashhad, Iran

Email: modagheghmh@mums.ac.ir    Tel: +985138047201
